# Supplementary material for: A sensitive lateral flow test strip sensor for visual detection of acid red 18 in food using bicentric-emission carbon dots
Source: Royal Society of Chemistry journal article supplement (doi:10.1039/d3nr05662g), 2024-01-01
Supplement: d3nr05662g1.pdf [file d3nr05662g1.pdf]

## Supporting Information

### **A Sensitive Lateral Flow Test Strip Sensor for Visual Detection of Acid Red 18 in Food Using Bicentric-Emission Carbon Dots**

Houwen Hu<sup>a,1</sup>, Zewei Chen<sup>b,1</sup>, Tingting Li<sup>a</sup>, Linfan Wang<sup>a</sup>, Haoming Xing<sup>a</sup>, Guoqiang Guo<sup>a,c</sup>, Gang Wang<sup>a,d,\*</sup>, Da Chen<sup>a,\*</sup>

<sup>a</sup>Department of Microelectronic Science and Engineering, School of Physical Science and Technology, Ningbo University, Ningbo 315211, P. R. China.

<sup>b</sup>Department of Electrical and Electronic Engineering, Synchrotron Light Application Center, Saga University, Saga 840-8502, Japan.

<sup>c</sup>Department of Materials Science and Engineering, Shenzhen Key Laboratory of Full Spectral Solar Electricity Generation (FSSEG), Southern University of Science and Technology, Shenzhen 518055, P. R. China.

<sup>d</sup>National Key Laboratory of Materials for Integrated Circuits, Shanghai Institute of Microsystem and Information Technology, Chinese Academy of Sciences, Shanghai 200050, P. R. China.

\*Corresponding author:

E-mail address: [gangwang@nbu.edu.cn](mailto:gangwang@nbu.edu.cn) (G. Wang); [chenda@nbu.edu.cn](mailto:chenda@nbu.edu.cn) (D. Chen)

Houwen Hu and Zewei Chen contributed equally to this work.

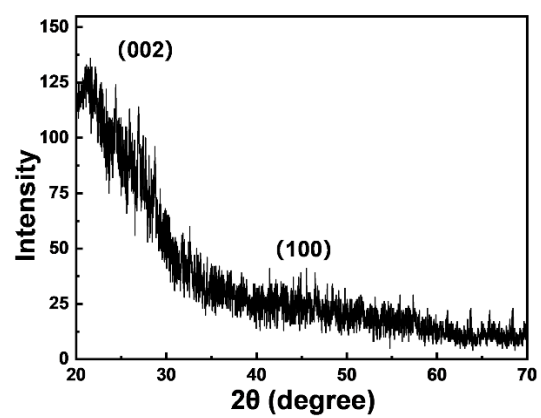

**Fig. S1** XRD pattern of N-CDs.

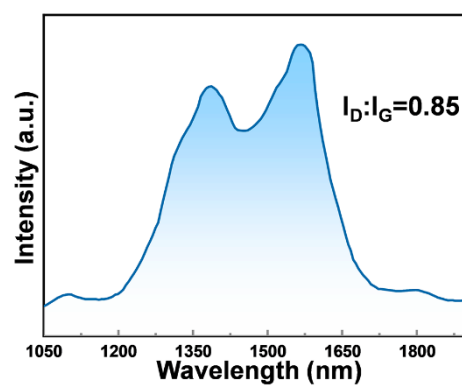

**Fig. S2** Raman pattern of N-CDs.

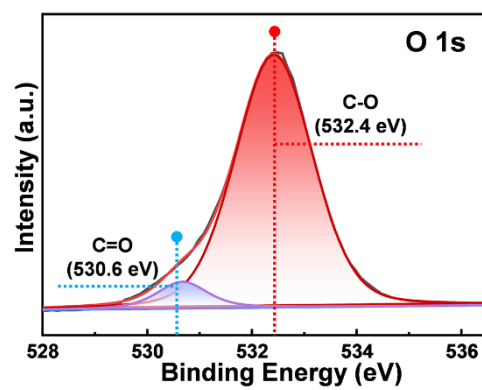

**Fig. S3** High-resolution XPS spectrum of O 1s.

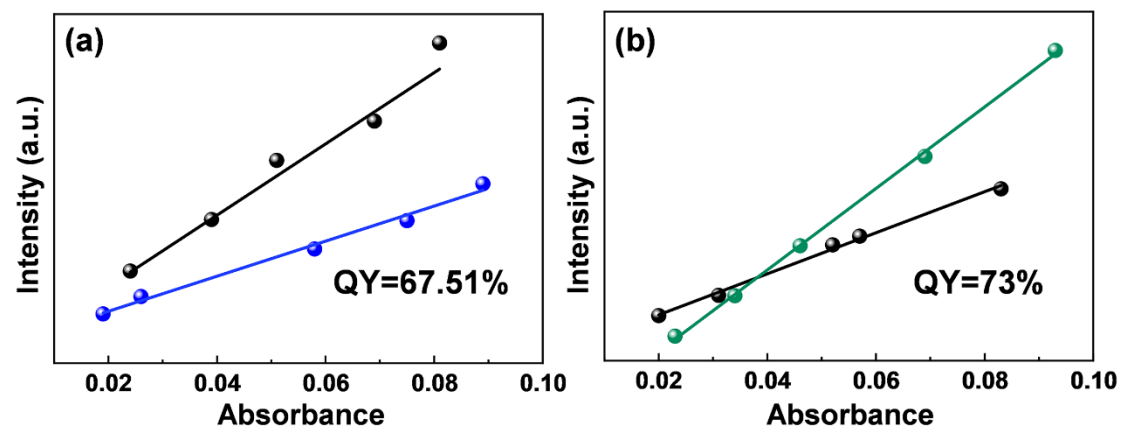

**Fig. S4** The linear relationship between 425 nm (a) and 541 nm (b) fluorescence integrated intensity and optical density from the absorbance of N-CDs and Rhodamine B.

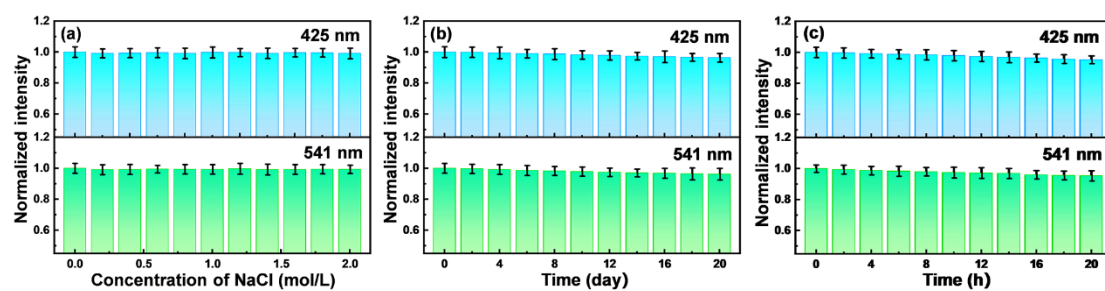

**Fig. S5** Fluorescence stability of N-CDs under different concentrations of NaCl (a), storage time in daylight (b) and ultraviolet light (c).

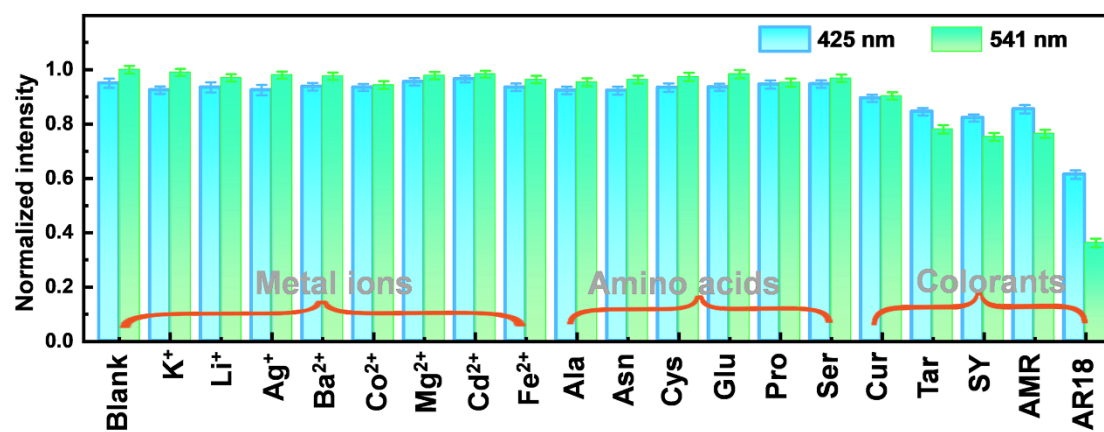

**Fig. S6** Selectivity of N-CDs. The concentration of interferent is 100  $\mu$ M.

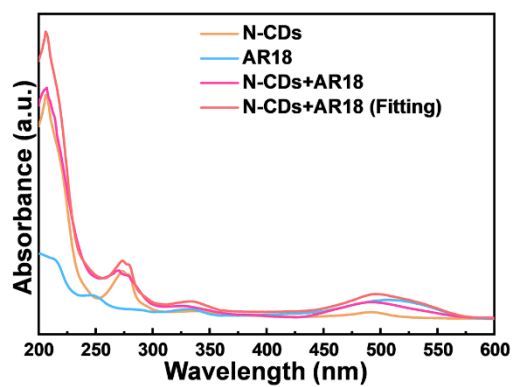

**Fig. S7** UV-vis absorption spectra of N-CDs, AR18, the mixture of N-CDs and AR18 and the fitting curve of the mixture.

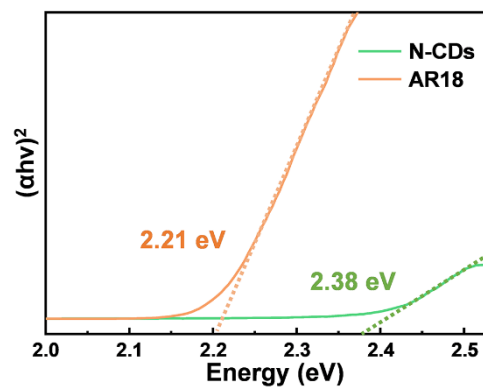

**Fig. S8** Tauc plots of N-CDs (orange line) and AR18 (green line).

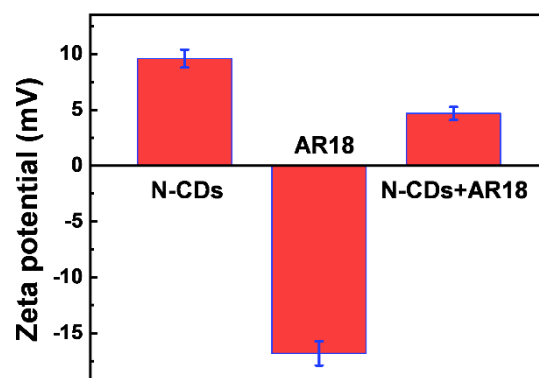

**Fig. S9** Zeta potential of AR18, N-CDs and N-CDs+AR18.

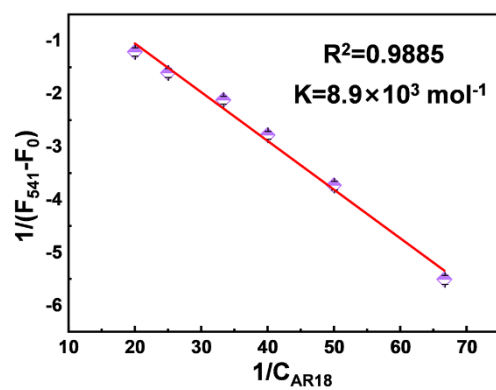

**Fig. S10** Benesi-Hildebrand plot of N-CDs upon the addition of AR18.

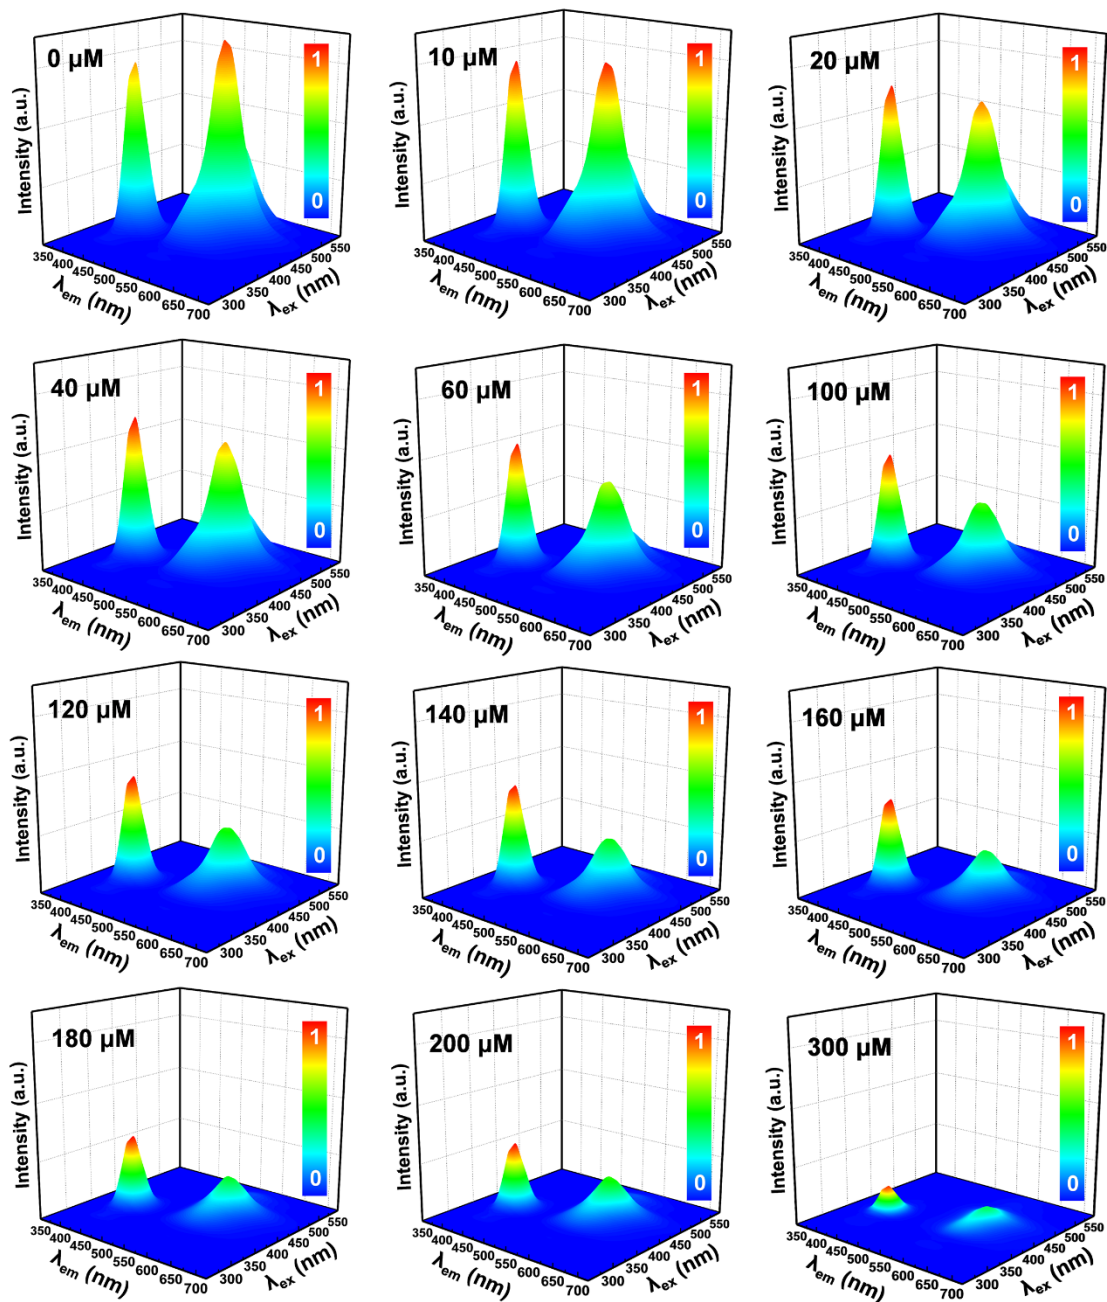

**Fig. S11** Normalized 3D fluorescent matrix scanning map of N-CDs with different concentrations of AR18.

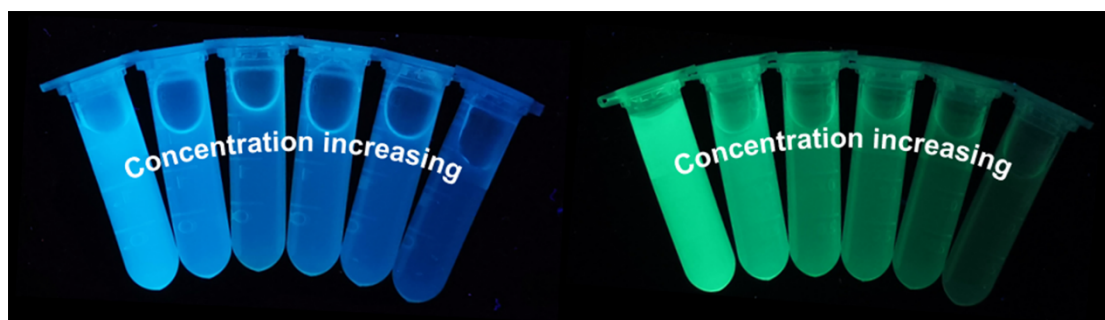

**Fig. S12** The images of N-CDs with different concentration of AR18 under UV light of 365 nm (left) and 470 nm (right).

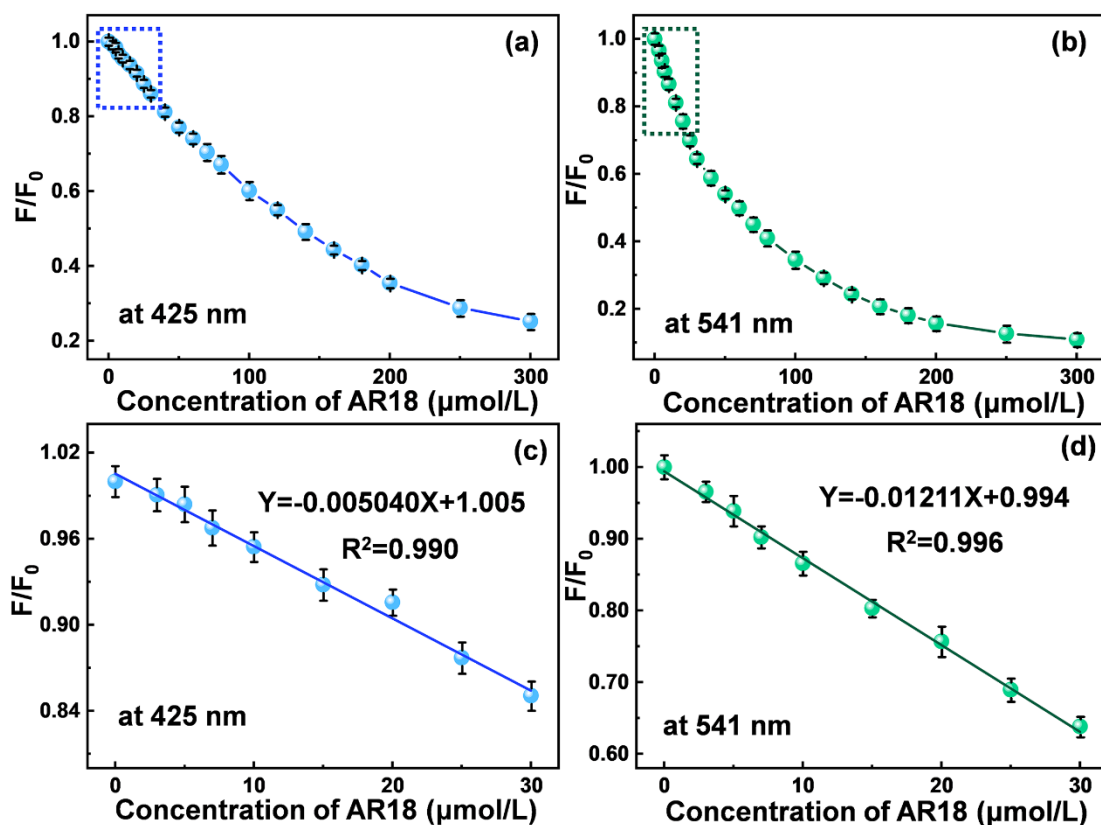

**Fig. S13** The relationship between fluorescence intensity ratio ( $F/F_0$ ) and the concentration of AR18 under the emission wavelength of 425 nm (a) and 541 nm (b). Linear fitting between  $F/F_0$  and the concentration of AR18 under the emission wavelength of 425 nm (c) and 541 nm (d).

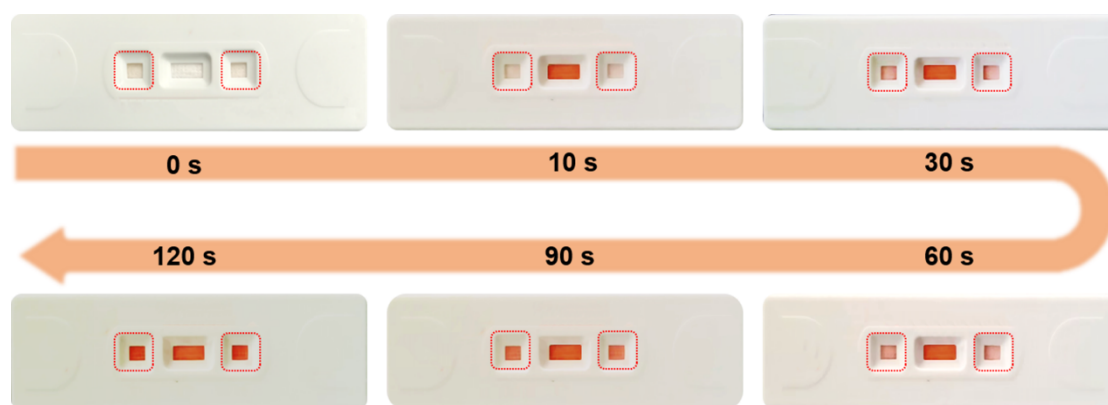

**Fig. S14** The solution flow on the LFTS sensing platform.

**Table S1.** Comparations among different detection methods of AR18.

| Methods      |                             | Analyte | Materials                     | Linear Range (μM) | LOD (μM) | Ref.      |
|--------------|-----------------------------|---------|-------------------------------|-------------------|----------|-----------|
| SERS         | -                           | AR18    | UiO-66 (NH <sub>2</sub> ) @Au | 1.65-82.7         | 0.664    | 1         |
| SERS         | -                           | AR18    | AuNPs                         | 5-500             | 5        | 2         |
| HPLC         | -                           | AR18    | -                             | 1.65-33.09        | 0.414    | 3         |
| HPLC-UV      | -                           | AR18    | -                             | 0.165-16.54       | 0.0993   | 4         |
| Fluorescence | Single fluorescence         | AR18    | F-SiQDs                       | 1-100             | 0.33     | 5         |
| Fluorescence | Ratiometric fluorescence    | AR18    | Fan, N-CDs                    | 20-55             | 0.0548   | 6         |
| Fluorescence | 3D-ratiometric fluorescence | AR18    | N-CDs                         | 0.0539-30         | 0.0539   | This work |

## References

1. L. Wu, H. Pu, L. Huang, D. Sun, *Food Chem.*, 2022, **328**, 127105.
2. X. Tian, Z. Fan, *Spectrochim. Acta A*, 2012, **96**, 600-604.
3. M. Khanavi, M. Hajimahmoodi, A. Ranjbar, M. Oveisi, M. Ardekani, G. Mogaddam, *Food Anal. Method.*, 2012, **5**, 408-415.
4. S. Dixit, S. Khanna, M. Das, *J. AOAC INT.*, 2010, **93**, 1503-1514.
5. Y. Liu, M. Zan, L. Cao, J. Peng, P. Wang, X. Pang, Y. Zhang, L. Li, Q. Mei, W. Dong, *Microchem. J.*, 2022, **179**, 107453.
6. Y. Tu, Z. Liu, L. Jiang, Y. Xiang, F. Song, L. Meng, X. Ji, L. Yuan, *Dyes Pigm.*, 2023, **210**, 111024.
